# Supplementary material for: Dynamics of mutations in patients with essential thrombocythemia treated with imetelstat
Source: PubMed Central journal article supplement — Haematologica. 2020 Jul 30;106(9):2397–404. doi: 10.3324/haematol.2020.252817 (PMC8409045; doi:10.3324/haematol.2020.252817), 2020-07-30
Supplement: 2020_252817_LEIBUNDGUT_SUPPL.pdf [file 2020_252817_LEIBUNDGUT_SUPPL.pdf]

# Dynamics of mutations in patients with essential thrombocythemia treated with imetelstat

Elisabeth Oppliger Leibundgut,<sup>1,2</sup> Monika Haubitz,<sup>2</sup> Bart Burington,<sup>3</sup> Oliver G. Ottmann,<sup>4</sup> Gary Spitzer,<sup>5</sup> Olatoyosi Odenike,<sup>6</sup> Michael A. McDevitt,<sup>7</sup> Alexander Röth,<sup>8</sup> David S. Snyder<sup>9</sup> and Gabriela M. Baerlocher<sup>1,2</sup>

<sup>1</sup>Department of Hematology and Central Hematology Laboratory, Inselspital, Bern University Hospital, Bern, Switzerland; <sup>2</sup>Department for BioMedical Research (DBMR), University of Bern, Bern, Switzerland; <sup>3</sup>Geron Corporation, Menlo Park, CA, USA (at time of study); <sup>4</sup>Department of Haematology, Cardiff University, Cardiff, UK; <sup>5</sup>Cadex Genomics, Redwood City, CA, USA; <sup>6</sup>University of Chicago Medical Center, Chicago, IL, USA; <sup>7</sup>Johns Hopkins University School of Medicine, Divisions of Hematology, and Hematological Malignancy, Baltimore, MD, USA (at time of study); <sup>8</sup>Department of Hematology, West German Cancer Center, University Hospital Essen, University of Duisburg-Essen, Essen, Germany and <sup>9</sup>Gehr Family Center for Leukemia Research, City of Hope National Medical Center, Duarte, CA, USA

©2021 Ferrata Storti Foundation. This is an open-access paper. doi:10.3324/haematol.2020.252817

Received: March 23, 2020.

Accepted: July 21, 2020.

Pre-published: July 30, 2020.

Correspondence: *ELISABETH OPPLIGER LEIBUNDGUT* - elisabeth.oppliger@insel.ch

*GABRIELA M. BAERLOCHER* - gabriela.baerlocher@hematology.ch

---

## Supplementary Appendix

**Table S1. Patient baseline demographics.**

| Patients (N=18)                                       | Median (Range) or N (%) |
|-------------------------------------------------------|-------------------------|
| Age (years)                                           | 59.5 (21-83)            |
| >60 years                                             | 8 (44%)                 |
| History of thrombosis                                 | 5 (28%)                 |
| Sex                                                   |                         |
| Female                                                | 10 (56%)                |
| Male                                                  | 8 (44%)                 |
| Race                                                  |                         |
| Black/African American                                | 2 (11%)                 |
| White                                                 | 16 (89%)                |
| Years since initial diagnosis                         | 7.2 (0.3-24.9)          |
| Platelet count (x10 <sup>3</sup> /μL)                 | 788 (521-1359)*         |
| Hematocrit                                            | 37.3 (26.4-45.4)        |
| WBC count (x10 <sup>3</sup> /μL)                      | 7.8 (3.0-14.6)          |
| Splenomegaly                                          | 1 (5.6%)                |
| Bone marrow reticulin fibrosis (grade 1+ or 2+)       | 6 (33%)                 |
| Bone marrow megakaryocyte hyperplasia                 | 14 (78%)                |
| Bone marrow cellularity                               |                         |
| Hypocellular                                          | 2 (14%)                 |
| Normocellular                                         | 9 (64%)                 |
| Hypercellular                                         | 3 (21%)                 |
| Missing                                               | 4                       |
| Prior hydroxyurea for ET                              | 17 (94%)                |
| Prior anagrelide for ET                               | 13 (72%)                |
| Prior interferon for ET                               | 4 (22%)                 |
| Prior hydroxyurea and anagrelide for ET               | 12 (67%)                |
| Prior hydroxyurea, anagrelide, and interferon for ET  | 3 (17%)                 |
| More than one prior therapy (anagrelide ± interferon) | 13 (72%)                |
| Resistant to at least one prior therapy               | 9 (50%)                 |
| Intolerant of at least one prior therapy              | 14 (78%)                |

\*One patient did not meet inclusion criteria for minimum baseline platelet count, but investigator felt cytoreductive therapy was clinically indicated.

Table adapted from Baerlocher *et al.*, N Engl J Med 2015; 373:920-928, DOI: 10.1056/NEJMoa1503479

**Table S2. Additional mutations at study entry.**

| Gene          | Amino Acid Exchange | Position on Chromosome | Genomic Position (hg19) | Reference | Variant | VAF* at study entry % | VAF* at best molecular response % | Patient UPN |
|---------------|---------------------|------------------------|-------------------------|-----------|---------|-----------------------|-----------------------------------|-------------|
| <i>ASXL1</i>  | p.Tyr591Ter         | chr 20                 | 31022287                | -         | A       | 30                    | 4                                 | 17          |
| <i>ASXL1</i>  | p.Gly646Trpfs*12    | chr 20                 | 31022449                | -         | G       | 33                    | 18                                | 9           |
| <i>CBL</i>    | c.1432-1G>A         | chr 11                 | 119155678               | G         | A       | 5                     | <3                                | 9           |
| <i>DNMT3A</i> | p.Ala644Thr         | chr 2                  | 25466773                | C         | T       | 3                     | <3                                | 14          |
| <i>DNMT3A</i> | p.Arg688His         | chr 2                  | 25464450                | C         | T       | 4                     | 6                                 | 14          |
| <i>DNMT3A</i> | p.Gly722Asp         | chr 2                  | 25463517                | C         | T       | 16                    | 35                                | 18          |
| <i>DNMT3A</i> | p.Tyr735Cys         | chr 2                  | 25463289                | T         | C       | 7                     | <3                                | 4           |
| <i>DNMT3A</i> | p.Met880Val         | chr 2                  | 25457249                | T         | C       | 45                    | 6                                 | 10          |
| <i>DNMT3A</i> | c.2597+1G>A         | chr 2                  | 25458575                | C         | T       | 8                     | 7                                 | 14          |
| <i>EZH2</i>   | p.Asp293Ala         | chr 7                  | 148523575               | T         | G       | 10                    | <3                                | 4           |
| <i>SF3B1</i>  | p.Lys666Arg         | chr 2                  | 198267360               | T         | C       | 9                     | 8                                 | 4           |
| <i>SF3B1</i>  | p.Lys700Glu         | chr 2                  | 198266834               | T         | C       | 45                    | 42                                | 7           |
| <i>TET2</i>   | p.Arg1465Ter        | chr 4                  | 106193931               | C         | T       | 7                     | 3                                 | 4           |
| <i>TET2</i>   | p.Tyr1608Leufs*6    | chr 4                  | 106196489               | -         | T       | 33                    | 16                                | 2           |
| <i>TET2</i>   | p.Met1772Cysfs*48   | chr 4                  | 106196981               | A         | -       | 42                    | 4                                 | 10          |
| <i>TP53</i>   | p.His179Arg         | chr 17                 | 7578394                 | T         | C       | 5                     | 8                                 | 4           |
| <i>TP53</i>   | p.Arg249Lys         | chr 17                 | 7577535                 | C         | T       | 3                     | <3                                | 1           |
| <i>U2AF1</i>  | p.Gln157Pro         | chr 21                 | 44514777                | T         | G       | 28                    | 4                                 | 9           |

VAF, variant allele frequency. \*LOD at 2%
